# Supplementary material for: Pvr expression regulators in equilibrium signal control and maintenance of Drosophila blood progenitors
Source: eLife. 2014 Sep 8;3:e03626. doi: 10.7554/eLife.03626 (PMC4185420; doi:10.7554/eLife.03626)
Supplement: Supplementary file 1. — Genes and phenotypes associated with P{Mae-UAS.6.11} LA insertion lines expressed with HHLT-gal4. Screen and line identifiers are shown along with the predicted misexpressed gene and the associated whole-animal lymph gland and circulating cell phenotype. DOI: http://dx.doi.org/10.7554/eLife.03626.018 [file elife03626s001.xlsx]

## Sheet: Sheet1 (3)
SUPPLEMENTARY TABLE 1
Genes and phenotypes associated with P{Mae-UAS.6.11} LA insertion lines expressed with HHLT-gal4
Line #	LA line ID	Proximal CG (v5.7)	Gene	lymph gland phenotype	circulating cell density
1	1	CG10601	mirr	baggy	high
2	2	CG34373	Ect4	large	high
3	4	CG4145	Cg25C	wt	high
4	5	CG31753	ham	very large, baggy	very high, tumors
5	7	CG9768	hkb	small	wt
6	10	CG4354	slbo	very large	wt
7	12	CG14895	Pak3	very large	wt
8	14	CG8085	RN-tre	small, baggy	wt
9	19	CG2072	TXBP181-like	very large	high
10	20	CG6061	mip120	small, baggy	low
11	21	CG10377	Hrb27C	missing	low
12	29	CG12283	kek1	very large	wt
13	33	CG32434	siz	large	wt
14	39	CG33182	CG33182	large	high
15	44	CG32082	CG32082	very large	high
16	47	CG15118	CG15118	large	high
17	50	CG6040	CG6040	large	wt
18	52	CG18783	Kr-h1	large	wt
19	60	CG9537	DLP	wt	wt
20	64	CG12424	CG12424	large	high
21	72	CG8532	lqf	large	high
22	74	CG13577	CG13577	very large	wt
23	83	CG8152	CG8152	large	high
24	85	CG6412	CG6412	large	wt
25	87	CG2009	bip2	small	low
26	93	CG10570	CG10570	large	high
27	96	CG1555	cn	large, baggy	high
28	99	CG7187	Ssdp	very large	high, tumors
29	103	CG4608	bnl	large, slightly baggy	low
30	106	CG17154	CG17154	baggy	high
31	108	CG10009	Noa36	large	wt
32	111	CG10023	Fak56D	large	wt
33	114	CG4449	CG4449	large	wt
34	121	CG2530	corto	slightly large	high
35	122	CG7656	CG7656	very large	wt
36	123	CG10072	sgl	small	low
37	125	CG8032	CG8032	abnormal	high
38	126	CG4289	CG4289	large	high
39	127	CG17549	CG17549	large	high
40	129	CG7831	ncd	small	wt
41	135	CG1214	ru	very large	high
42	136	CG10686	tral	large, baggy	wt
43	142	CG31000	heph	small	wt
44	143	CG10934	CG10934	large	wt
45	146	CG17259	CG17259	large, baggy	high
46	150	CG7879	CG7879	baggy	low
47	156	CG10753	snRNP69D	small	high
48	157	CG10564	Ac78C	large	wt
49	160	CG7398	Trn	large	high
50	164	CG3068	aur	small	low
51	166	CG4059	ftz-f1	slightly large	slightly high
52	167	CG31191	CG31191	large	wt/low
53	171	CG6963	gish	large	wt/low
54	188	CG9613	Coq2	wt	high
55	190	CG17800	Dscam	large	high
56	191	CG4879	RecQ5	baggy	slightly high
57	195	CG11686	CG11686	large	slightly high
58	200	CG14821	CG14821	large, baggy	slightly high
59	207	CG18023	Eip78C	slightly large	high
60	212	CG32423	shep	large	wt
61	214	CG4036	CG4036	large	high
62	216	CG34188	CG34188	wt	high
63	217	CG3143	foxo	baggy	wt
64	225	CG5269	vib	very large	wt
65	226	CG1395	stg	large	wt
66	227	CG30482	CG30482	large	high
67	237	CG6311	CG6311	large	high, tumors
68	238	CG17836	CG17836	large	slightly high
69	241	CG13148	CG13148	large	high
70	249	CG16973	msn	large	wt/high
71	252	CG1864	Hr38	small	wt
72	255	CG9328	CG9328	wt	high
73	267	CG11093	CG11093	large	high
74	271	CG11399	CG11399	extremely large	extremely high
75	279	CG33547	Rim	small	wt
76	281	CG34379	CG34379	small	low
77	282	CG4952	dac	wt	high
78	285	CG8817	lilli	large	high
79	287	CG7913	PP2A-B'	small	wt
80	297	CG4220	elB	small	very high
81	301	CG11873	CG11873	large	wt
82	307	CG10198	Nup98	small, baggy	low
83	313	CG32103	CG32103	large	very high
84	314	CG17292	CG17292	large	high
85	316	CG12052	lola	wt	slightly high
86	323	CG5643	wdb	wt	high
87	325	CG34349	CG34349	large	wt
88	326	CG5060	CG5060	baggy	wt
89	330	CG33111	CG33111	large	wt
90	332	CG8127	Eip75B	large, baggy	high
91	334	CG11396	CG11396	very large	very high, tumors
92	339	CG3836	stwl	very large, in pieces	low
93	340	CG11502	svp	large	wt
94	341	CG8253	tun	large	very high
95	349	CG3938	CycE	large	high
96	351	CG1130	scrt	slightly large	wt
97	356	CG17342	Lk6	wt	high
98	360	CG18490	CG18490	large	high
99	364	CG6203	Fmr1	baggy	wt
100	366	CG32134	btl	large	high
101	368	CG17161	grp	very large	wt
102	369	CG12537	rdx	wt	slightly high
103	370	CG5965	woc	extremely large	extremely high, tumors
104	375	CG1433	Atu	very large	wt
105	376	CG8524	NK7.1	small	wt
106	384	CG32137	CG32137	slightly large	high
107	386	CG10578	DnaJ-1	large	wt
108	398	CG8149	CG8149	large	high
109	401	CG2204	G-oalpha47A	wt	high
110	402	CG6643	CG6643	wt	slightly high
111	407	CG11988	neur	large	high
112	410	CG12402	CG12402	large, baggy	wt
113	416	CG18617	Vha100-2	wt	wt
114	426	CG8368	CG8368	small	low
115	438	CG4276	aru	large	very high
116	440	CG14938	crol	small	wt
117	445	CG17950	HmgD	baggy	very low
118	447	CG17927	Mhc	large	high
119	454	CG5953	CG5953	wt	high
120	458	CG6854	CG6854	large	high
121	471	CG1129	CG1129	baggy	wt
122	478	CG13425	bl	large	slightly high
123	487	CG10738	CG10738	small, baggy	very high
124	489	CG32848, CG12345	VAChT, Cha	small	wt
125	491	CG15845	Adf1	missing	low
126	495	CG12478	bru-3	large, baggy	wt
127	506	CG5170	Dp1	large	very high
128	508	CG13384	CG13384	very large	very high
129	509	CG6778	Aats-gly	large	wt
130	512	CG2003	CG2003	large	high
131	519	CG12972	CG12972	very large	wt
132	524	CG5422	Rox8	very large	wt/low, tumors
133	527	CG9375	Ras85D	very large	very high, tumors
134	559	CG31243	cpo	large, baggy	wt
135	562	CG3925	CG3925	large	wt
136	578	CG10927	CG10927	large	high
137	581	CG10205	CG10205	wt	high
138	597	CG9310	Hnf4	large	high
139	599	CG12864	Su(var)2-HP2	wt	high
140	600	CG3363	CG3363	missing	low
141	604	CG8776	CG8776	large	high
142	606	CG3090	Sox14	large	high
143	607	CG17100	CG17100	large	high, tumors
144	610	CG12078	CG12078	wt/small	high
145	612	CG6701	CG6701	large	high
146	614	CG31988	CG31988	very large	high
147	617	CG3838	CG3838	very large	large cells
148	618	CG5279	Rh5	wt	very high
149	622	CG12768	CG12768	very large	very high, tumors
150	623	CG11337	CG11337	very large/missing	very high/slightly low
151	626	CG5557	sqz	very large	slightly high
152	627	CG11798	chn	very large	very high
153	629	CG10967	Atg1	missing	low/wt
154	630	CG8367	cg	missing	wt
155	632	CG12765	CG12765	missing	wt
156	634	CG7563	CalpA	large	very high
157	636	CG31716	CG31716	large, baggy	large cells
158	637	CG5637	nos	very large	low
159	641	CG6494	h	very large	high
160	642	CG15711	CG15711	large	high
161	643	CG3798	Nmda1	large	high
162	645	CG7574	bip1	wt	very high
163	646	CG17652	CG17652	large	high
164	648	CG11849	dan	very large	high, tumors
165	649	CG8290	CG8290	missing	wt
166	650	CG8165, CG8176	CG8165, CG8176	large, baggy	wt
167	653	CG13109	tai	large	wt
168	657	CG33113	Rtnl1	very large	wt
169	659	CG13089	CG13089	large	high
170	667	CG10967	Atg1	very large	very high
171	677	CG4612	CG4612	large	wt
172	679	CG13220	CG13220	missing	wt
173	681	CG3654	CG3654	large	high
174	682	CG5738	lolal	large	high
175	687	CG12919	egr	large	wt
176	694	CG32048	CG32048	small	wt
177	695	CG18578	Ugt86Da	large	wt
178	696	CG7446	Grd	wt	high
179	699	CG5393	apt	large	very high, tumors
180	701	CG4214	Syx5	large	high
181	706	CG6889	tara	large	high
182	707	CG17228	pros	small	wt
183	714	CG12008	kst	large	low
184	715	CG33261	Trl	large, baggy	high
185	716	CG10897	tou	large	high
186	717	CG3836	stwl	very large, baggy	high, tumors
187	718	CG1250	sec23	small	low
188	719	CG1856	ttk	large	very high
189	720	CG14060	CG14060	large	high
190	726	CG13894	CG13894	large	wt
191	728	CG2368	psq	large/small	high
192	729	CG4114	ex	wt	low
193	734	CG2054	Cht2	very large	wt
194	736	CG5637	nos	small	low
195	739	CG17077	pnt	slightly large	wt
196	740	CG8878	CG8878	large	high
197	742	CG1832	CG1832	wt	wt
198	747	CG10229	katanin-60	large	wt
199	753	CG33182	CG33182	large	wt
200	756	CG7892	nmo	large, baggy	wt
201	757	CG7892	nmo	large	high
202	766	CG9035	Tapdelta	large	high
203	768	CG5554	CG5554	small	wt
204	772	CG1228	Ptpmeg	large	high
205	773	CG13183	CG13183	large	high
206	781	CG33155, CG30481	CG33155, mRpL53	very large	very high, tumors
207	785	CG12769	CG12769	very large	wt
208	786	CG4799	Pen	large	high
209	787	CG8385	Arf79F	large	low
210	790	CG30401	CG30401	very large	wt, tumors
211	791	CG18647	bin	large	low
212	793	CG10573	ko	large	wt
213	798	CG15862	Pka-R2	large	slightly high
214	801	CG8571	smid	large	wt
215	803	CG1945	faf	very large	very high, tumors
216	805	CG31938	CG31938	large	high
217	806	CG8542	Hsc70-5	large	low
218	825	CG32164	CG32164	very large	high
219	831	CG8735	CG8735	large	high
220	834	CG10334	spi	large	high
221	836	CG7269	Hel25E	very large	high
222	842	CG3671	Mvl	small	low
223	846	CG3919	CG3919	large	high, tumors
224	850	CG31705	CG31705	small	wt
225	852	CG3919	CG3919	large	high
226	856	CG10737	CG10737	slightly large	slightly high
227	858	CG11785	bai	large	wt
228	861	CG5575	ken	large	wt
229	863	CG9218	sm	small	wt
230	866	CG32435	chb	large	slightly high
231	870	CG14991	Fit1	very large	wt
232	871	CG1449	zfh2	wt	slightly high
233	872	CG9383	asf1	small	low
234	874	CG8979	CG8979	large	wt
235	885	CG4422	Gdi	large	wt
236	888	CG32198	CG32198	large	wt
237	890	CG2052	CG2052	large	high
238	896	CG5180	CG5180	baggy	wt
239	902	CG7490	RpLP0	very large	high, tumors
240	903	CG3365	drongo	very large	high, tumors
241	904	CG2050	mod	small	wt
242	907	CG32096	rols	small	wt
243	909	CG4412	ATPsyn-Cf6	large	wt
244	910	CG3410	lectin-24A	very large	high
245	912	CG3563	CG3563	wt	high
246	919	CG9884	oaf	large	high
247	921	CG5555	CG5555	wt	high
248	922	CG9206	Gl	baggy	very high
249	928	CG6930	l(3)neo38	large, baggy	low
250	933	CG17462	CG17462	large	high
251	939	CG8920	CG8920	large	high
252	944	CG9397	jing	wt	high
253	948	CG15552	Sox100B	wt	high
254	949	CG33197	mbl	large	low
255	950	CG16973	msn	large	wt
256	955	CG10267	CG10267	small/missing	low
257	956	CG8833	CG8833	baggy	wt
258	958	CG6794	Dif	very large, baggy	extremely high
259	960	CG10021	bowl	large	wt
260	963	CG8493	CG8493	large	high
261	967	CG8314, CG8315	CG8314, CG8315	wt	high
262	982	CG18214	trio	large	high
263	983	CG4225	CG4225	wt	high
264	986	CG30116	CG30116	wt	high
265	987	CG7425	eff	large	high, tumors
266	989	CG9088	lid	very large	high
267	992	CG31732	yuri	very large	very high
268	998	CG8614	Neos	slightly large	wt
269	999	CG9429	Crc	baggy	wt
270	1003	CG1621	CG1621	large	low
271	1006	CG8118	mam	large	high
272	1008	CG12110	Pld	small	wt
273	1009	CG8479	opa1-like	large	high
274	1015	CG18817, CG30159	Tsp-42Ea. CG30159	wt	high
275	1020	CG10106	Tsp42Ee	very large	wt
276	1024	CG13148	CG13148	wt	high, blackened cells
277	1025	CG1775	Med	large, baggy	wt
278	1030	CG4551	smi35A	large	wt
279	1039	CG10868	orb	large	wt
280	1042	CG10712	Chro	very large	wt
281	1053	CG1081	Rheb	large	high
