# Supplementary material for: Pvr expression regulators in equilibrium signal control and maintenance of Drosophila blood progenitors
Source: eLife. 2014 Sep 8;3:e03626. doi: 10.7554/eLife.03626 (PMC4185420; doi:10.7554/eLife.03626)
Supplement: Supplementary file 2. — Genes and phenotypes associated with UAS-RNAi lines expressed with HHLT-gal4. Screen and line identifiers are shown along with the targeted gene for knockdown by RNAi, the associated whole-animal lymph gland phenotype based upon GFP expression, and the Peroxidasin (Pxn) expression phenotype of dissected lymph glands. DOI: http://dx.doi.org/10.7554/eLife.03626.019 [file elife03626s002.xlsx]

## Sheet: SupTable2 (3)
SUPPLEMENTARY TABLE 2
Genes and phenotypes associated with UAS-RNAi lines expressed with HHLT-gal4
Line #	UAS-RNAi ID	gene target	Gene	LG size/quality	Peroxidasin pattern
1	3775	CG10021	bowl	large	normal
2	3859	CG4214	Syx5	small/missing	expanded
3	3920	CG10334	spi	large	normal
4	6543	CG7398	Trn	large/baggy	expanded
5	9428	CG5661	Sema-5c	large/normal	reduced/normal
6	9572	CG5738	lolal	small	expanded
7	12574	CG12052	lola	large/baggy	expanded
8	12759	CG6854	CTPsyn	small/baggy	expanded
9	15886	CG6376	E2f	small/normal	expanded
10	16854	CG15118	CG15118	small/normal	normal
11	17760	CG1395	stg	small	normal
12	17954	CG10009	Noa36	small/missing	expanded
13	19485	CG10009	Noa36	small/missing	expanded
14	21776	CG4043	Rrp46	small/missing	reduced/mixing?
15	22836	CG10267	CG10267	small/missing	expanded
16	22883	CG12864	Su(var)2-HP2	small/normal	reduced/normal
17	23082	CG8385	Arf79F	large/baggy	normal
18	24125	CG8542	Hsc70-5	small/missing	normal
19	24215	CG8149	CG8149	baggy	expanded
20	24552	CG1250	sec23	small/missing	normal
21	26011	CG7425	eff	small	mixing?
22	26051	CG32435	chb	small/normal	normal/mixing?
23	26175	CG3363	CG3363	small/normal	normal
24	26176	CG3363	CG3363	small	expanded
25	26370	CG4036	CG4036	large	expanded
26	26537	CG4422	Gdi	large	normal
27	28971	CG8878	CG8878	large/baggy	reduced
28	28998	CG8920	CG8920	large/norm	normal
29	29375	CG9537	DLP	small/normal	normal
30	29439	CG32103	CG32103	small	normal
31	30150	CG6311	Edc3	large	normal
32	30680	CG1945	faf	large/normal	normal
33	31266	CG10573	ko	large/baggy	normal
34	31343	CG10753	SmD1	small/missing	reduced/mixing?
35	31933	CG12402	CG12402	large	normal
36	32885	CG17342	Lk6	large/normal	reduced
37	33735	CG31000	heph	large	normal
38	35061	CG6061	mip120	large	normal
39	35147	CG6930	l(3)neo38	large	reduced
40	35949	CG8532	lqf	large/normal	normal
41	35967	CG8571	smid	small/missing	reduced/mixing?
42	37836	CG3410	lectin-24A	small	normal
43	38254	CG18490	CG42671	large/normal	reduced
44	38413	CG10897	tou	large/thin	reduced/normal
45	38472	CG1129	CG1129	small/missing	expanded
46	39780	CG13148	CG13148	large	normal
47	39844	CG14895	Pak3	large	normal
48	40306	CG31938	Rrp40	small/normal	expanded
49	40535	CG4551	smi35A	large/normal	normal
50	41009	CG3836	stwl	small/normal	expanded
51	41439	CG5422	Rox8	large	normal
52	42204	CG9088	lid	large	normal
53	42590	CG4289	CG4289	large/baggy	normal
54	42822	CG17100	cwo	small/normal	normal
55	43521	CG12283	kek1	large/normal	normal
56	43713	CG2072	Mad1	large	normal
57	44606	CG6778	Aats-gly	small/missing	expanded
58	45259	CG8368	CG8368	small	reduced/normal
59	46375	CG32137	CG32137	large	normal
60	49753	CG33155	CG33155	small/normal	expanded
61	50133	CG10601	mirr	large	normal/mixing?
62	52497	CG4612	CG4612	large/normal	normal
63	10198R-1	CG10198	Nup98	small/missing	expanded
64	12030R-2	CG12030	Gale	small	expanded
65	12765R-3	CG12765	fsd	small/normal	expanded
66	14895R-2	CG14895	Pak3	large	normal
67	18578R-1	CG18578	Ugt86Da	small/normal	normal
68	3365R-1	CG3365	drongo	large/normal	normal
69	3925R-1	CG3925	CG3925	small/normal	normal
70	4289R-4	CG4289	CG4289	large/normal	normal
71	7425R-1	CG7425	eff	small	reduced
72	7574R-2	CG7574	bip1	small/baggy	expanded
73	9383R-2	CG9383	asf1	baggy	normal
Lines 1 - 62 from VDRC, Lines 63 - 73 from NIG Japan ; Bold lines exhibit the expanded Peroxidasin phenotype;
Italicized CG numbers indicate duplicate gene hits

## Sheet: SupTable2 (2)
SUPPLEMENTARY TABLE 2
Genes and phenotypes associated with UAS-RNAi lines expressed with HHLT-gal4
Line #	UAS-RNAi ID	gene target	Gene	Off targets	LG size/quality	Peroxidasin pattern
1	3775	CG10021	bowl	3	large	normal
2	3859	CG4214	Syx5	0	small/missing	expanded
3	3920	CG10334	spi	0	large	normal
4	6543	CG7398	Trn	1	large/baggy	expanded
5	9428	CG5661	Sema-5c	0	large/normal	reduced/normal
6	9572	CG5738	lolal	0	small	expanded
7	12574	CG12052	lola	0	large/baggy	expanded
8	12759	CG6854	CTPsyn	0	small/baggy	expanded
9	15886	CG6376	E2f	1	small/normal	expanded
10	16854	CG15118	CG15118	0	small/normal	normal
11	17760	CG1395	stg	1	small	normal
12	17954	CG10009	Noa36	0	small/missing	expanded
13	19485	CG10009	Noa36	0	small/missing	expanded
14	21776	CG4043	Rrp46	1	small/missing	reduced/mixing?
15	22836	CG10267	CG10267	0	small/missing	expanded
16	22883	CG12864	Su(var)2-HP2	0	small/normal	reduced/normal
17	23082	CG8385	Arf79F	1	large/baggy	normal
18	24125	CG8542	Hsc70-5	2	small/missing	normal
19	24215	CG8149	CG8149	0	baggy	expanded
20	24552	CG1250	sec23	0	small/missing	normal
21	26011	CG7425	eff	0	small	mixing?
22	26051	CG32435	chb	1	small/normal	normal/mixing?
23	26175	CG3363	CG3363	0	small/normal	normal
24	26176	CG3363	CG3363	0	small	expanded
25	26370	CG4036	CG4036	1	large	expanded
26	26537	CG4422	Gdi	1	large	normal
27	28971	CG8878	CG8878	0	large/baggy	reduced
28	28998	CG8920	CG8920	0	large/norm	normal
29	29375	CG9537	DLP	0	small/normal	normal
30	29439	CG32103	CG32103	1	small	normal
31	30150	CG6311	Edc3	3	large	normal
32	30680	CG1945	faf	0	large/normal	normal
33	31266	CG10573	ko	0	large/baggy	normal
34	31343	CG10753	SmD1	1	small/missing	reduced/mixing?
35	31933	CG12402	CG12402	1	large	normal
36	32885	CG17342	Lk6	3	large/normal	reduced
37	33735	CG31000	heph	0	large	normal
38	35061	CG6061	mip120	0	large	normal
39	35147	CG6930	l(3)neo38	1	large	reduced
40	35949	CG8532	lqf	1	large/normal	normal
41	35967	CG8571	smid	1	small/missing	reduced/mixing?
42	37836	CG3410	lectin-24A	0	small	normal
43	38254	CG18490	CG42671	0	large/normal	reduced
44	38413	CG10897	tou	3	large/thin	reduced/normal
45	38472	CG1129	CG1129	0	small/missing	expanded
46	39780	CG13148	CG13148	0	large	normal
47	39844	CG14895	Pak3	0	large	normal
48	40306	CG31938	Rrp40	0	small/normal	expanded
49	40535	CG4551	smi35A	0	large/normal	normal
50	41009	CG3836	stwl	0	small/normal	expanded
51	41439	CG5422	Rox8	0	large	normal
52	42204	CG9088	lid	0	large	normal
53	42590	CG4289	CG4289	1	large/baggy	normal
54	42822	CG17100	cwo	0	small/normal	normal
55	43521	CG12283	kek1	0	large/normal	normal
56	43713	CG2072	Mad1	2	large	normal
57	44606	CG6778	Aats-gly	0	small/missing	expanded
58	45259	CG8368	CG8368	1	small	reduced/normal
59	46375	CG32137	CG32137	0	large	normal
60	49753	CG33155	CG33155	4	small/normal	expanded
61	50133	CG10601	mirr	1	large	normal/mixing?
62	52497	CG4612	CG4612	0	large/normal	normal
63	10198R-1	CG10198	Nup98	0	small/missing	expanded
64	12030R-2	CG12030	Gale	0	small	expanded
65	12765R-3	CG12765	fsd	0	small/normal	expanded
66	14895R-2	CG14895	Pak3	0	large	normal
67	18578R-1	CG18578	Ugt86Da	0	small/normal	normal
68	3365R-1	CG3365	drongo	3	large/normal	normal
69	3925R-1	CG3925	CG3925	1	small/normal	normal
70	4289R-4	CG4289	CG4289	1	large/normal	normal
71	7425R-1	CG7425	eff	0	small	reduced
72	7574R-2	CG7574	bip1	0	small/baggy	expanded
73	9383R-2	CG9383	asf1	1	baggy	normal
Lines 1 - 62 from VDRC, Lines 63 - 73 from NIG Japan ; Bold lines exhibit the expanded Peroxidasin phenotype;
Italicized CG numbers indicate duplicate gene hits
